## RESEARCH ARTICLE

# Maternal loading of a small heat shock protein increases embryo thermal tolerance in *Drosophila melanogaster*

Brent L. Lockwood<sup>1,\*</sup>, Cole R. Julick<sup>2</sup> and Kristi L. Montooth<sup>2</sup>

## ABSTRACT

Maternal investment is likely to have direct effects on offspring survival. In oviparous animals whose embryos are exposed to the external environment, maternal provisioning of molecular factors like mRNAs and proteins may help embryos cope with sudden changes in the environment. Here, we sought to modify the maternal mRNA contribution to offspring embryos and test for maternal effects on acute thermal tolerance in early embryos of *Drosophila melanogaster*. We drove *in vivo* overexpression of a small heat shock protein gene (*Hsp23*) in female ovaries and measured the effects of acute thermal stress on offspring embryonic survival and larval development. We report that overexpression of the *Hsp23* gene in female ovaries produced offspring embryos with increased thermal tolerance. We also found that brief heat stress in the early embryonic stage (0–1 h old) caused decreased larval performance later in life (5–10 days old), as indexed by pupation height. Maternal overexpression of *Hsp23* protected embryos against this heat-induced defect in larval performance. Our data demonstrate that transient products of single genes have large and lasting effects on whole-organism environmental tolerance. Further, our results suggest that maternal effects have a profound impact on offspring survival in the context of thermal variability.

**KEY WORDS:** Development, *Drosophila*, Maternal effect, *Hsp23*, Thermal stress

## INTRODUCTION

Acute thermal stress is principally felt at the cellular and biochemical levels through the disruption of macromolecular structures (Richter et al., 2010; Somero et al., 2017). These thermal perturbations pose challenges for ectotherms that live in variable thermal environments where sudden changes in temperature are a frequent occurrence (Denny et al., 2011; Terblanche et al., 2011; Dowd et al., 2015; Buckley and Huey, 2016). Thermal stress causes proteins to unfold, which leads not only to the loss of protein function but also to protein aggregation that is toxic to cells (Richter et al., 2010; Somero et al., 2017). To combat these effects, nearly all living organisms possess a conserved set of cellular responses – collectively referred to as the heat shock response or cellular stress response – which are characterized by rapid shifts in the expression of hundreds to thousands of gene loci (Gasch et al., 2000; Leemans et al., 2000; Buckley et al., 2006; Lockwood et al., 2010; Brown et al., 2014).

A key component of the heat shock response is the dramatic induction of genes that encode heat shock proteins (HSPs), while the majority of the rest of the proteome ceases to be expressed (Tissières et al., 1974; Mirault et al., 1978; Lindquist, 1981; Hofmann and Somero, 1996; Tomanek and Somero, 1999; Tomanek and Zuzow, 2010). HSPs function as molecular chaperones that bind, sequester and help refold thermally denatured proteins (Richter et al., 2010), providing thermal protection at the molecular level that scales up to thermal protection of the whole-organism phenotype. Indeed, sublethal thermal exposures that induce the heat shock response allow organisms to survive more extreme subsequent thermal exposures that would otherwise be lethal (Arrigo, 1987; Feder et al., 1996). Transgenic overexpression of HSPs confers increased whole-organism thermal tolerance (Welte et al., 1993; Feder et al., 1996), and the expression of HSPs has been shown to be adaptive under conditions of heat stress, as laboratory selection to high temperatures leads to higher expression of HSPs (Rudolph et al., 2010). In addition, many populations and species that live in environments characterized by frequent, acute exposures to extreme heat have evolved higher expression of HSPs than closely related species that inhabit more benign thermal environments (Hofmann and Somero, 1996; Tomanek and Somero, 2000; Dong et al., 2008; Lockwood et al., 2010; Schoville et al., 2012; Dilly et al., 2012).

Despite the broad evolutionary conservation of the heat shock response across taxa (Kültz, 2005; Somero et al., 2017), animals in the earliest life stages have vastly reduced heat shock responses (Graziosi et al., 1980; Welte et al., 1993) as a result of the lack of transcriptional activity of early zygotes (Tadros and Lipshitz, 2009). This poses a challenge to oviparous species with external embryonic development. Early embryos of these organisms are directly exposed to the thermal environment and may have little opportunity to express protective proteins from their own genomes. Rather, their mechanisms for coping with thermally induced molecular damage are limited to the molecular factors (i.e. RNAs, protein and organic osmolytes) that are loaded into eggs by mothers (Wieschaus, 1996). Indeed, previous studies have shown early embryonic stages to be more thermally sensitive than later stages (Walter et al., 1990; Welte et al., 1993).

Given that maternal oogenesis establishes the early embryonic transcriptome and proteome (Schübach and Wieschaus, 1986; Wieschaus, 1996; Tadros and Lipshitz, 2009), maternal molecular factors are likely to be a major determinant of developmental robustness and survival in the face of variable thermal environments. However, few studies have characterized the molecular roles of maternal effects in the context of embryonic thermal tolerance (Sato et al., 2015). In fruit flies (*Drosophila melanogaster*), the early time window of minimal zygotic transcriptional activity spans the first 2 h of development, after which zygotic transcription begins to predominate over the maternally provided pool of mRNAs (Blythe and Wieschaus,

<sup>1</sup>Department of Biology, University of Vermont, Burlington, VT 05405, USA. <sup>2</sup>School of Biological Sciences, University of Nebraska, Lincoln, NE 68588, USA.

\*Author for correspondence (Brent.Lockwood@uvm.edu)

 B.L.L., 0000-0003-4694-5897

2015a). Consequently, 4 h old embryos are more heat tolerant than earlier stages (Walter et al., 1990), and by 14 h post-fertilization (Welte et al., 1993), embryos attain approximately the same degree of thermal tolerance that they possess later on as larvae, pupae and adults (Huey et al., 1991; Feder et al., 1997).

Among the mRNAs that are loaded into eggs by *D. melanogaster* mothers, messages that encode members of the small heat shock protein (sHSP) family are highly abundant, with two sHSPs being among the top 1% of most highly abundant transcripts in the early embryo (see Fig. 1) (Pauli et al., 1989; Michaud and Tanguay, 2003; Brown et al., 2014; Morrow and Tanguay, 2015). Genes encoding this class of proteins are also among the most highly expressed genes following heat stress in larvae, pupae and adults (Berger and Woodward, 1983; Ayme and Tissières, 1985; Horwitz, 1992; Brown et al., 2014). sHSPs are a family of molecular chaperones that serve a wide range of molecular functions, including stabilizing major cellular structural components like the cytoskeleton (Leicht et al., 1986; Horwitz et al., 1992) and the cell membrane (Tsvetkova et al., 2002; Horváth et al., 2008). Thus, the maternal contribution of these proteins may be a critical factor in maintaining embryonic development of offspring in both benign thermal conditions and the presence of thermal stress.

Here, we established a role for maternal effects in conferring embryonic thermal tolerance in *D. melanogaster* via maternal loading of the sHSP gene *Hsp23*, which is a major component of the heat shock response. We report that among sHSP genes, *Hsp23* is unique in that it is a major component of the adult heat shock response but only present at low abundance in early embryos. Further, by driving overexpression of this gene in female oocytes,

we observed marked increases in thermal tolerance in offspring embryos and lasting effects that influenced larval performance (i.e. pupation height) – both of which were significant maternal effects. Overall, our results demonstrate that single genes of large effect can contribute significantly to whole-organism phenotypes, such as thermal tolerance, and that maternal loading of mRNAs can influence not only early embryonic development but also larval performance later in life.

## MATERIALS AND METHODS

### modENCODE expression data

modENCODE is a collaborative project that generated transcriptomic data from RNA-sequencing (RNA-Seq) across life stages and in response environmental stressors in *D. melanogaster* (Brown et al., 2014). Expression data were downloaded from FlyBase (Attrill et al., 2016) and consist of mRNA levels (expressed as reads per kilobase of transcript per million mapped reads, RPKM) of 18,029 unique transcripts. Among these transcripts, we used non-linear least-squares regression fitting to compare mRNA levels in early embryos (0–2 h post-fertilization) and 4 day old heat-shocked adults (36°C for 1 h), with Robust regression and Outlier removal (ROUT) analysis (Motulsky and Brown, 2006) to identify outliers.

### Fly stocks

To assess the effects of targeted overexpression and increased maternal loading of *Hsp23* in early embryos, we used the Gal4-UAS system (Brand and Perrimon, 1993; Duffy, 2002) in a two-step crossing scheme (Fig. 2A). First, we used a female germline Gal4 driver, *MTD-Gal4* (Bloomington Stock, BL no. 31777), crossed with *UAS-Hsp23* (BL no. 30541) to cause *Hsp23* overexpression in female ovaries (*Hsp23<sup>OE</sup>*). These constructs, when brought together in a genetic cross, drive overexpression of the target gene (*Hsp23*) in female ovaries and thus modify the levels of *Hsp23* mRNA that are loaded into eggs. Second, we tested the effects of this overexpression construct in early embryos by comparing the phenotypes of 0–1 h old offspring embryos from reciprocal crosses between the *Hsp23<sup>OE</sup>* and the control genotype (*w<sup>1118</sup>*) that switched the female and male genotypes, such that embryos from one cross (female *Hsp23<sup>OE</sup>* × male *w<sup>1118</sup>*) had mothers that overexpressed *Hsp23* and embryos from the other cross (female *w<sup>1118</sup>* × male *Hsp23<sup>OE</sup>*) were genetically similar but had control mothers with wild-type *Hsp23* expression. The control genetic background was *w<sup>1118</sup>* (BL no: 5905), which was the original strain used to generate the *UAS-Hsp23* transgenic line. We note that the *MTD-Gal4* strain was generated in the *w\** genetic background. Therefore, F<sub>2</sub> offspring of *Hsp23<sup>OE</sup>* mothers received mitochondria from *w\**, whereas offspring from the reciprocal cross received mitochondria from *w<sup>1118</sup>*. While these represent two distinct mtDNA genetic backgrounds, many lab stocks were originally derived from similar mitochondrial lineages and natural populations of *D. melanogaster* harbor relatively low levels of mtDNA polymorphism (Cooper et al., 2015). Thus, we interpret measurable differences in embryonic thermal tolerance among genotypes to be largely the result of differential maternal loading of *Hsp23* mRNA, and not an artifact of mitochondrial lineage. All stocks were obtained from the Bloomington Drosophila Stock Center (Bloomington, IN, USA) and maintained at 22°C on standard cornmeal, yeast and agar medium.

We focused our experiments on the maternal effects of overexpression and increased loading of *Hsp23* and did not perform a targeted knockdown of this gene for the following reasons. First, *Hsp23* is present in such low abundance in early

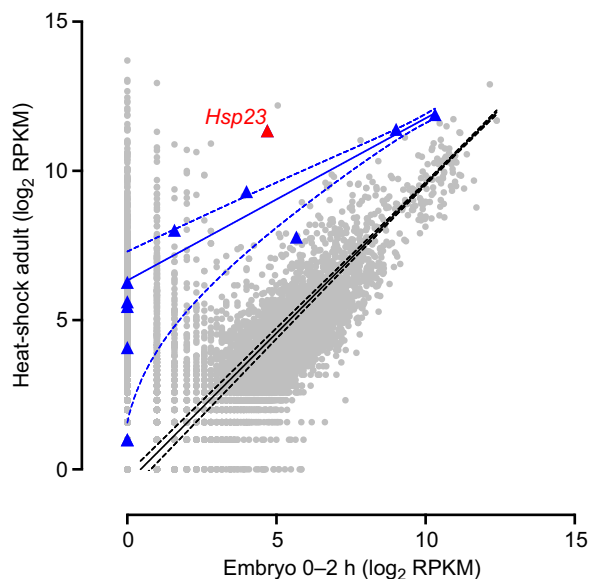

**Fig. 1. Relationship between transcriptomes and small heat shock protein (sHSP) mRNA levels in early embryos versus heat-shocked adults.** Data represent 18,029 unique transcripts and are expressed as mean expression values (RPKM) on a log<sub>2</sub> scale of 0–2 h old embryos and 4 day old adults (males and females pooled). Transcripts encoding sHSPs are shown as blue triangles, *Hsp23* is highlighted in red, and all other transcripts are shown as gray circles. The solid black line ( $\pm 95\%$  confidence bands as black dashed lines) represents the least-squares regression fit of all transcripts ( $R^2=0.17$ ,  $y=2^{(1.002 \times \log x - 0.1344)}$ ) and the solid blue line ( $\pm 95\%$  confidence bands as blue dashed lines) represents the robust regression fit of sHSP transcripts ( $R^2=0.97$ ,  $y=2^{(0.5436 \times \log x + 1.905)}$ ), for which *Hsp23* was a significant outlier (ROUT outlier analysis,  $Q=1\%$ ).

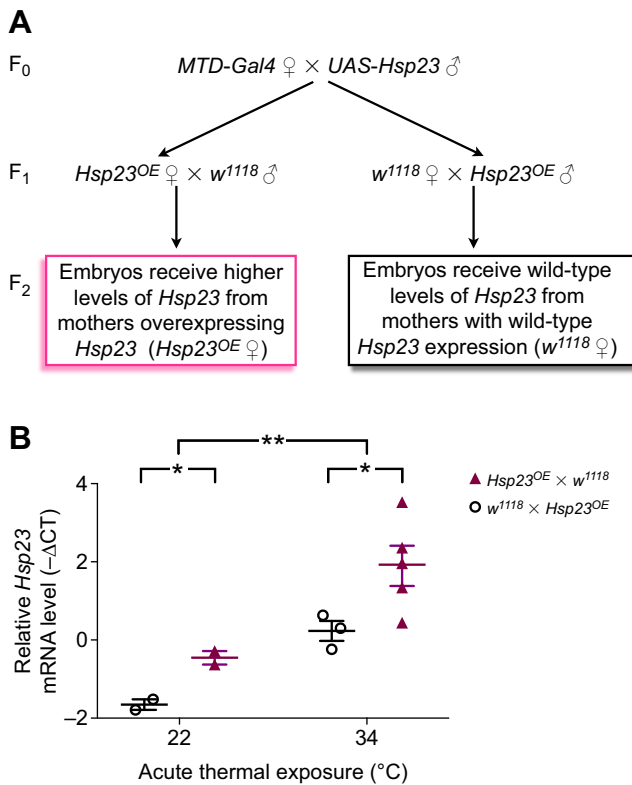

**Fig. 2. *Hsp23* overexpression in female ovaries increases *Hsp23* mRNA levels in offspring embryos.** (A) Crossing scheme used to drive overexpression of *Hsp23* in the maternal germline, thus increasing maternal loading of *Hsp23* mRNA into offspring embryos. The genotype of each sex is indicated (female×male). The *MTD-Gal4* construct drives overexpression of the UAS target gene (*UAS-Hsp23*) in the germline of F<sub>1</sub> females (*Hsp23*<sup>OE</sup> ♀) but not males (*Hsp23*<sup>OE</sup> ♂). Reciprocal crosses between *Hsp23*<sup>OE</sup> and the control genetic background (*w*<sup>1118</sup>) produce F<sub>2</sub> embryos that possess differential levels of maternally loaded *Hsp23* (as shown in B). (B) Relative *Hsp23* mRNA levels in early embryos, normalized to the *Act5c* reference gene for each sample, expressed as  $-\Delta CT$ , where  $\Delta CT = CT_{Hsp23} - CT_{Act5c}$ . Each data point represents a pooled batch of 50–100 embryos (0–1 h old) that were exposed to the indicated temperature for 45 min. Horizontal lines indicate means among separate embryo batches and error bars indicate s.e.m. \* $P < 0.05$ , \*\* $P < 0.01$  (ANOVA temperature effect,  $F_{1,8} = 16.45$ ,  $P = 0.0037$ , maternal genotype effect,  $F_{1,8} = 7.572$ ,  $P = 0.025$ , temperature×maternal genotype interaction,  $F_{1,8} = 0.2216$ ,  $P = 0.6504$ ).

embryos (Table 1, Fig. 1) that knocking down the expression of this gene is likely to have little effect. Additionally, there is evidence that the more abundant sHSPs, such as *Hsp26* and *Hsp27*, compensate for the absence of *Hsp23* under heat-stress conditions (Bettencourt et al., 2008). Second, recent reviews of the literature suggest that, despite the preponderance of targeted gene knockdown experimental designs, many loss-of-function studies across a broad array of species have failed to produce measurable phenotypic outcomes (Gibney et al., 2013; Evans, 2015). This may be due to functional redundancy among genes or a lack of assay sensitivity to characterize more subtle physiological effects (Bischof et al., 2013). Whatever the biological significance of these trends in loss-of-function studies, gain-of-function experimental designs are warranted and have led to the recent creation of comprehensive genetic resources for targeted gene over-expression (Bischof et al., 2013). Third, we predicted that overexpression and increased maternal loading of *Hsp23* into early embryos would more closely phenocopy the higher thermal tolerance of later stages of

**Table 1. mRNA levels of small heat shock protein (sHSP) genes in 5 day old adults, in 0–2 h old embryos and in response to heat shock (4 day old adults at 36°C for 1 h)**

| CG no.  | Gene name      | Adult (5 days) |        | Embryo (0–2 h) | Heat shock (adult – 4 days) |
|---------|----------------|----------------|--------|----------------|-----------------------------|
|         |                | Male           | Female |                |                             |
| CG4183  | <i>Hsp26</i>   | 134            | 751    | 1276           | 3792                        |
| CG4466  | <i>Hsp27</i>   | 57             | 224    | 515            | 2689                        |
| CG4463  | <i>Hsp23</i>   | 43             | 13     | 25             | 2604                        |
| CG4460  | <i>Hsp22</i>   | 18             | 7      | 15             | 635                         |
| CG4533  | <i>l(2)efl</i> | 209            | 63     | 2              | 257                         |
| CG14207 | –              | 115            | 55     | 50             | 219                         |
| CG7409  | –              | 421            | 84     | 0              | 76                          |
| CG4190  | <i>Hsp67Bc</i> | 3              | 0      | 0              | 48                          |
| CG4461  | –              | 304            | 66     | 0              | 43                          |
| CG4167  | <i>Hsp67Ba</i> | 1              | 0      | 0              | 16                          |
| CG13133 | –              | 8              | 1      | 0              | 1                           |
| CG43851 | –              | 4              | 0      | 0              | 1                           |

Data are expressed as mean expression values (RPKM) and are ordered according to expression levels in heat-shocked adults. Data are from modENCODE (Brown et al., 2014).

development that possess an enhanced ability, relative to early embryos, to induce the high levels of expression of heat shock genes, including *Hsp23* (Fig. 1).

#### Quantification of *Hsp23* mRNA levels

We extracted total RNA from separate pooled batches of 20–100 embryos (0–1 h old) that constituted our biological replicates for quantitative PCR (qRT-PCR). Embryos were collected from grape juice agar plates after being exposed to 22 or 34°C for 45 min (see ‘Embryonic thermal tolerance’ section, below), rinsed in 1× PBS, dechorionated in 50% bleach for 1 min, and rinsed again in diH<sub>2</sub>O. We note that embryos were less than 2 h old, which is prior to the activation of zygotic transcription of the majority of genes (Ali-Murthy et al., 2013; Blythe and Wieschaus, 2015b). Embryos were then transferred to microcentrifuge tubes, frozen in liquid nitrogen, and stored at  $-80^{\circ}\text{C}$  for up to 1 month prior to RNA extraction. We extracted total RNA with TRIzol (Molecular Research Center, Cincinnati, OH, USA) and Phase Lock Gel tubes (Quantabio, Beverly, MA, USA), which are designed to maintain stable separation of aqueous and organic phases. RNA quality was assessed on a NanoDrop spectrophotometer (Wilmington, DE, USA). We then removed any residual DNA with the TURBO DNA-FREE kit (Thermo Fisher Scientific, Waltham, MA, USA). We performed reverse transcription reactions with the SuperScript III First-Strand Synthesis kit using oligo-dT primers (Thermo Fisher). qPCR was conducted with the Agilent Brilliant III Ultra-Fast SYBR Green Master Mix (Agilent Technologies, Santa Clara, CA, USA) on a Bio-Rad CFX Connect Real-Time PCR system (Bio-Rad, Hercules, CA, USA) using primer sets and reaction conditions that have been previously described (Bettencourt et al., 2008). We calculated reaction efficiencies from standard curves for both the target gene (*Hsp23*) and the reference gene (*Act5c*), and we found the efficiencies to be identical for the two genes ( $E = 1.87$ ). We chose *Act5c* as the reference gene based on previous work that has shown it to exhibit stable expression across benign and heat-shock conditions (Hoekstra and Montooth, 2013). We used the efficiency value to calculate average fold-differences among experimental groups as previously described (Pfaffl, 2001). We compared relative *Hsp23* mRNA levels among experimental groups using an ANOVA of  $-\Delta CT$  values, where  $\Delta CT = CT_{Hsp23} - CT_{Act5c}$ .

### Embryonic thermal tolerance

We measured acute thermal tolerance in early embryos (0–1 h post-fertilization) from crosses between genotypes designed to generate overexpression or normal expression (see above; Fig. 2A). At this early stage, embryos coordinate early developmental processes via the molecular factors (i.e. RNA and protein) provided to them by their mothers (Tadros and Lipshitz, 2009; Blythe and Wieschaus, 2015a). Thus, embryonic phenotypic effects that we report on herein are largely the result of maternal effects mediated by changes in the expression of genes in female ovaries, the products of which are subsequently loaded into eggs. We chose this early stage because we sought to characterize the effects of (1) maternal mRNA contributions and (2) targeted gene overexpression in the absence of a fully developed zygotic heat-shock transcriptional response. This allowed us to better isolate and characterize the functional contribution of the transcription of a single gene (i.e. *Hsp23*) for whole-organism acute thermal tolerance, without the potentially confounding effects of large and concomitant changes in the expression of other heat shock genes.

We designed our temperature treatments to mimic sudden (acute) changes in temperature that frequently occur in nature where the temperature of necrotic fruit can increase rapidly on a hot day (Feder et al., 1997; Terblanche et al., 2011). Adult flies, 3–5 days old, of the appropriate genotypes were allowed to mate and lay eggs on grape juice agar plates for 1 h at 22°C. These eggs were discarded as a pre-lay and adults were again allowed to mate and lay eggs for an additional hour. This pre-lay step was to ensure that all eggs collected over a 1 h period were of a similar age. Egg plates were then wrapped in Parafilm and submerged in a water bath set to one of a range of temperatures between 22 and 40°C (22, 24, 26, 28, 30, 32, 34, 36, 38 or 40°C) for 45 min. Because of the thermal mass of the egg plates, the embryos did not immediately experience the temperature of the water bath upon immersion, but rather were exposed to a thermal ramp that averaged +0.4°C min<sup>-1</sup> for all temperatures. While this rate of change is extreme, it is within the range of maximum measured rates of change in the field (Terblanche et al., 2011). After thermal exposure, a section of the agar containing 20 eggs was cut out and transferred to a food vial, where eggs were allowed to recover and develop at 22°C. Hatching, pupation and eclosion success were scored as the proportion of these 20 eggs that survived to each stage. Hatching success was scored at 48 h, pupation success at 5–10 days and eclosion at 10–15 days post-fertilization. We also scored development time as the length of time (days) to successful pupation and eclosion. Temperature treatments and phenotypic measurements were conducted on four to six vials in each of three to four separate generations for each cross type (i.e.  $N=4-6$  vials $\times$ 10 temperatures $\times$ 3–4 generations per genotype) for a total of 12–24 biological replicates per genotype per temperature.

We calculated the lethal temperature at which 50% of the embryos failed to hatch, pupate or eclose (LT<sub>50</sub>) via a least-squares logistic regression model. We allowed the  $y$ -intercept to vary between 0 and 1 and extrapolated the LT<sub>50</sub> from the inflection point of the logistic curve fit. This approach allowed us to infer thermal tolerance independently from other confounding factors that reduce hatching success, such as the presence of unfertilized eggs.

### Pupation height

We scored the average pupation height as a measurement of larval performance (Mueller and Sweet, 1986; Hoekstra et al., 2013). Pupation height was scored subsequent to early embryonic temperature treatments (see above) at 8–10 days post-fertilization.

Each food vial was divided into four quadrants; quadrant 1 spanned the distance from the bottom of the vial to 3.5 cm in height and quadrants 2–4 each comprised a 2 cm section up the height of the vial. Each pupa was scored a number between 1 and 4, corresponding to the quadrant in which it pupated. All pupae on the food were scored as 1 (quadrant 1). Average pupation height was then calculated separately for each vial.

### Statistics

LT<sub>50</sub> values were compared by assessing the fit of the logistic regression models to each genotype separately versus all genotypes combined via the extra sum-of-squares  $F$ -test and the corrected Akaike's information criterion (AICc). The effects of temperature, treatment and maternal genotype on development time were analyzed via ANOVA followed by Sidak's multiple comparisons test to assess pairwise differences. Pupation height was analyzed in the same manner via ANOVA and Sidak's test. All analyses were conducted in GraphPad Prism version 7 for Mac (GraphPad Software, La Jolla, CA, USA).

### RESULTS

Among all 18,029 transcripts included in the modENCODE dataset, mRNA levels in 0–2 h old embryos and 4 day old heat-shocked adults were positively correlated (Fig. 1; least-squares regression,  $R^2=0.17$ ,  $y=2^{(1.002\times\log x-0.1344)}$ ). Among the 12 sHSP genes, mRNA levels in embryos and heat-shocked adults were also positively correlated (Fig. 1; Robust regression,  $R^2=0.97$ ,  $y=2^{(0.5436\times\log x+1.905)}$ ), even though mRNA levels were higher in heat-shocked adults than in embryos (Table 1, Fig. 1). However, *Hsp23* was a significant outlier in this relationship (Fig. 1; ROUT outlier analysis,  $Q=1\%$ ). Of the sHSP genes, *Hsp23* had the biggest difference in expression level between early embryos and heat-shocked adults and was present at low levels in non-heat-shocked adults, with a heat-shock induction response of >100-fold (Table 1).

We sought to test the contribution of maternal *Hsp23* mRNAs to embryonic thermal tolerance by increasing *Hsp23* abundance in early embryos through overexpression in the maternal germline. We focused our functional genetic analyses on *Hsp23* because this gene (1) was the sole significant outlier among the sHSP genes in the relationship between early embryonic and heat-shocked adult gene expression (Fig. 1) and (2) showed the greatest induction in response to heat shock in adults (Table 1). These observations suggest that *Hsp23* plays a unique role among the sHSP genes in the heat shock response, and thus may be a key factor in conferring acute thermal tolerance.

Maternal genotype (*Hsp23*<sup>OE</sup> versus *w*<sup>1118</sup> control) and embryonic heat stress (45 min at 34°C) both had significant effects on *Hsp23* mRNA levels in early embryos (Table 2 and Fig. 2B; ANOVA temperature effect,  $F_{1,8}=16.45$ ,  $P=0.0037$ , maternal genotype effect,  $F_{1,8}=7.572$ ,  $P=0.025$ ), and these effects were independent of each other (ANOVA temperature $\times$ maternal genotype interaction,  $F_{1,8}=0.2216$ ,  $P=0.6504$ ). *Hsp23*-overexpressing females (*Hsp23*<sup>OE</sup>) laid eggs with 2.12-fold higher baseline levels of *Hsp23* mRNA at 22°C and 2.89-fold higher levels of *Hsp23* mRNA following heat shock at 34°C, relative to embryos that were offspring of mothers of the control genetic background (*w*<sup>1118</sup>) (Fig. 2B). In addition, heat shock led to significant increases in the levels of *Hsp23* mRNA regardless of maternal genotype, increasing by 4.44-fold and 3.26-fold (34°C relative to 22°C) in offspring embryos of (female $\times$ male) *Hsp23*<sup>OE</sup> $\times$ *w*<sup>1118</sup> and *w*<sup>1118</sup> $\times$ *Hsp23*<sup>OE</sup>, respectively (Fig. 2B).

**Table 2. Analysis of variance of relative *Hsp23* mRNA levels ( $\Delta\text{CT}=\text{CT}_{Hsp23}-\text{CT}_{Act5c}$ ) among maternal genotypes (*Hsp23*<sup>OE</sup> versus *w*<sup>1118</sup>) and embryonic heat stress temperatures (22 versus 34°C)**

| Source of variation           | SS    | DF | MS    | $F_{1,8}$ | % Total variation | <i>P</i> -value |
|-------------------------------|-------|----|-------|-----------|-------------------|-----------------|
| Temperature                   | 11.88 | 1  | 11.88 | 16.45     | 43.54             | 0.0037          |
| Maternal genotype             | 5.467 | 1  | 5.467 | 7.572     | 20.04             | 0.025           |
| Temperature×maternal genotype | 0.16  | 1  | 0.16  | 0.2216    | 0.59              | 0.65            |
| Residual                      | 5.776 | 8  | 0.722 |           |                   |                 |

Maternal overexpression of *Hsp23* significantly increased embryonic thermal tolerance by raising the  $LT_{50}$  by approximately 1°C (Fig. 3; extra sum of squares *F*-test,  $F_{1,262}=5.371$ ,  $P=0.02$ ). Embryos that successfully hatched also survived to pupation and adulthood, as 95–100% of larvae and pupae survived to pupation and eclosion, respectively, regardless of maternal genotype. Furthermore, there were no significant differences between the  $LT_{50}$  of hatching, pupation and eclosion successes for a given genotype (Fig. 3B; extra sum of squares *F*-test,

$P>0.05$ ), suggesting that effects of early, acute thermal stress on survival were largely localized to embryogenesis.

In addition to the positive and protective effect of maternal *Hsp23* overexpression for whole-embryo survival of thermal stress, maternal loading of this gene in early embryos had significant effects on larval performance, as indexed by pupation height. Exposure of 0–1 h old embryos to the brief (45 min) episode of thermal exposure resulted in larvae with significantly reduced pupation height at the highest temperatures (Fig. 4A), which explained 22% of the variation in pupation height (Table 3; ANOVA temperature effect,  $F_{8,189}=7.744$ ,  $P<0.0001$ ). Maternal *Hsp23* overexpression had no significant effect on pupation height overall (Fig. 4A, Table 3; ANOVA maternal genotype effect,  $F_{1,189}=3.674$ ,  $P=0.0568$ ) but conferred protection against the negative effects of heat stress on pupation height, particularly at 34°C (Fig. 4A, Table 3; ANOVA temperature×maternal genotype interaction,  $F_{8,189}=2.822$ ,  $P=0.0056$ , Sidak's test on pairwise difference at 34°C,  $P<0.001$ ).

Embryonic heat stress also caused significant increases in development time, as indexed by the length of time (days) to pupation (Fig. 4B), in offspring of both maternal genotypes (Table 3; ANOVA temperature effect,  $F_{8,169}=9.605$ ,  $P<0.0001$ ). Maternal overexpression of *Hsp23* slightly attenuated this thermally induced developmental delay, but this trend was not statistically significant (ANOVA maternal genotype effect,  $F_{1,169}=2.928$ ,  $P=0.0889$ , temperature×maternal genotype interaction,  $F_{8,169}=0.6591$ ,  $P=0.73$ ).

Embryonic heat stress also significantly affected the developmental time to adult eclosion (Fig. 4C, Table 4); however, the effect sizes were much smaller than the heat stress-induced delay to pupation, and the pattern was largely driven by a shorter time to eclosion at 22°C (Fig. 4C; ANOVA temperature effect,  $F_{8,347}=11.511$ ,  $P<0.001$ ). Maternal *Hsp23* overexpression had no significant effect on time to eclosion (Fig. 4C, Table 4; ANOVA maternal genotype effect,  $F_{1,347}=0.814$ ,  $P=0.3676$ ), regardless of temperature (ANOVA temperature×maternal genotype interaction,  $F_{8,347}=2.020$ ,  $P=0.1561$ ), sex (ANOVA sex×maternal genotype interaction,  $F_{1,347}=0.098$ ,  $P=0.7544$ ), or the interaction among all of these effects (ANOVA temperature×sex×maternal genotype interaction,  $F_{1,347}=0.1091$ ,  $P=0.7414$ ). There was a significant difference between females and males in time to eclosion across all

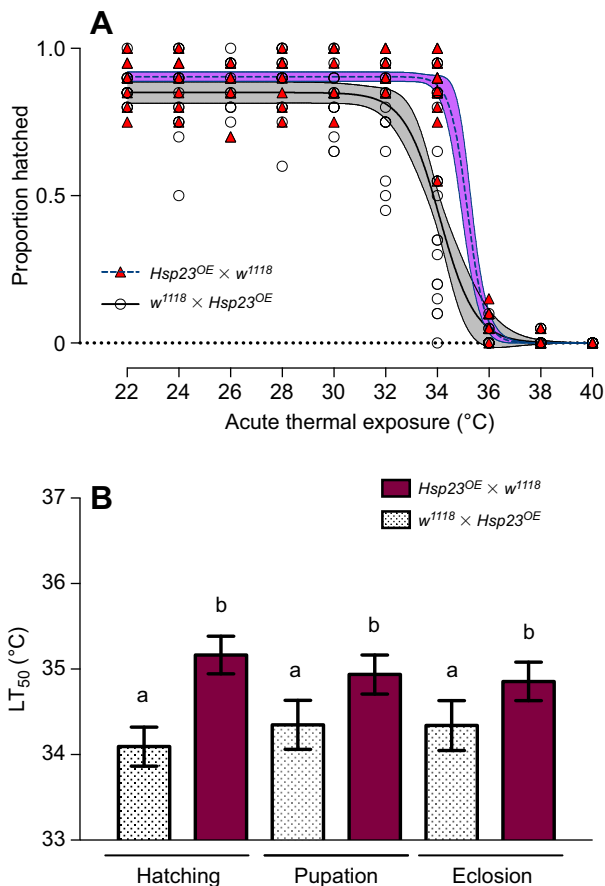

**Fig. 3. Higher maternal loading of *Hsp23* mRNA increases thermal tolerance of offspring embryos.** (A) Each data point represents the proportion of eggs ( $N=20$  eggs total, 0–1 h old) that hatched following 45 min exposure at the indicated temperature. Lines indicate least-squares fit of the logistic equation and shaded regions indicate 95% confidence bands. (B) Mean lethal temperature ( $LT_{50}$ ) values ( $\pm 95\%$  confidence interval) for hatching, pupation and eclosion success.  $LT_{50}$  values were extrapolated from the inflection points of the logistic survival curve fits (hatching success is shown in A), and confidence intervals represent the goodness of fit of the logistic regressions. Letters above the error bars indicate whether  $LT_{50}$  values were statistically indistinguishable (same letter) or significantly different (different letters;  $P<0.05$ , extra sum of squares *F*-test). The genotypes of the parents are indicated in each panel (female×male).

**Table 3. Percentage of total variation explained by the main effects of embryonic heat stress temperature, maternal genotype and their interaction on pupation height and days to pupation (two-way ANOVA)**

| Trait            | Temperature                | Maternal genotype | Temperature×maternal genotype |
|------------------|----------------------------|-------------------|-------------------------------|
| Pupation height  | <b>21.63% (&lt;0.0001)</b> | 1.28% (0.0568)    | <b>7.88% (0.0056)</b>         |
| Days to pupation | <b>28.97% (&lt;0.0001)</b> | 1.10% (0.0889)    | 1.99% (0.73)                  |

*P*-values are indicated in parentheses and significant effects are in bold.

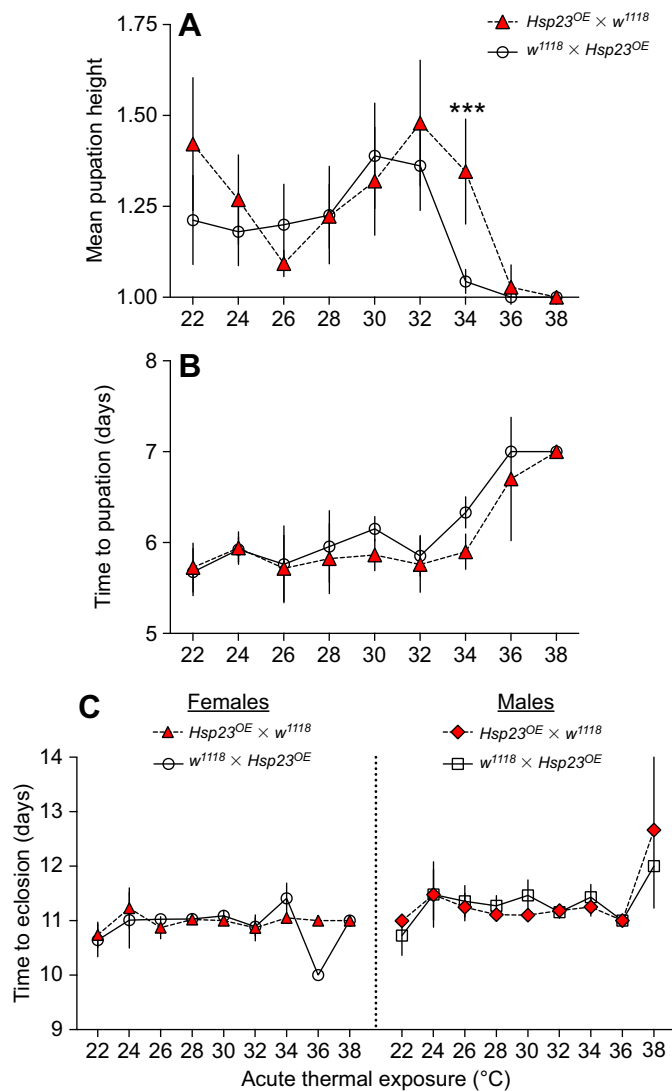

**Fig. 4. Heat stress in early embryos causes larval defects that are ameliorated by maternal loading of *Hsp23*.** (A) Mean pupation height among vials ( $N=18$  vials,  $\pm 95\%$  confidence interval), scored at 8–10 days post-fertilization following acute (45 min) early embryonic (0–1 h post-fertilization) exposure to the indicated temperature. Higher heat stress temperatures caused significant decreases in pupation height (ANOVA temperature effect,  $F_{8,189}=7.744$ ,  $P<0.0001$ ), but higher maternal loading of *Hsp23* removed this effect at 34°C (Sidak's test on pairwise difference at 34°C,  $***P<0.001$ ). (B) Mean time to pupation ( $\pm 95\%$  confidence interval) following early embryonic temperature exposure, as described in A. Higher embryonic temperature exposure caused increased time to pupation (Table 3; ANOVA temperature effect,  $F_{8,169}=9.605$ ,  $P<0.0001$ ), and there was a trend of maternal loading of *Hsp23* attenuating this effect (maternal genotype effect,  $F_{1,169}=2.928$ ,  $P=0.0889$ , temperature $\times$ maternal genotype interaction,  $F_{8,169}=0.6591$ ,  $P=0.73$ ). (C) Mean time to eclosion ( $\pm 95\%$  confidence interval) following early embryonic temperature exposure, as described in A. Males took longer to eclose than females at all temperatures (ANOVA, sex effect,  $F_{1,347}=30.263$ ,  $P<0.00001$ ), but the effects of heat stress on development time were similar between the sexes (ANOVA, temperature $\times$ sex interaction,  $F_{8,347}=0.149$ ,  $P=0.70$ ). Data represent values from females (left) and males (right). The genotypes of the parents are indicated in each panel (female $\times$ male).

temperatures, with females eclosing sooner than males, and sex accounted for the greatest variation in time to eclosion (Table 4, Fig. 4C; ANOVA sex effect,  $F_{1,347}=30.263$ ,  $P<0.00001$ ). And, while males on average suffered greater developmental delays to

**Table 4. Percentage of total variation explained by the main effects of embryonic heat stress temperature, maternal genotype, sex and their interaction on days to adult eclosion (3-way ANOVA)**

| Source of variation                                 | % Total variation          |
|-----------------------------------------------------|----------------------------|
| Temperature                                         | <b>2.94% (&lt;0.001)</b>   |
| Maternal genotype                                   | 0.21% (0.3676)             |
| Sex                                                 | <b>7.72% (&lt;0.00001)</b> |
| Temperature $\times$ maternal genotype              | 0.52% (0.1561)             |
| Temperature $\times$ sex                            | 0.038% (0.70)              |
| Maternal genotype $\times$ sex                      | 0.025% (0.7544)            |
| Temperature $\times$ maternal genotype $\times$ sex | 0.028% (0.7414)            |

*P*-values are indicated in parentheses and significant effects are in bold.

eclosion following acute exposure to 38°C (Fig. 4C), this effect was not significant (ANOVA temperature $\times$ sex interaction,  $F_{8,347}=0.149$ ,  $P=0.70$ ).

There was a slight discrepancy between the thermally induced delays in development to pupation versus eclosion. Specifically, embryonic thermal stress at 34 and 36°C caused delays in time to pupation but not eclosion (Fig. 4B,C). In effect, this means that the pupae that suffered developmental delays to pupation somehow recovered from this delay and were able to eclose on the same schedule as pupae that were exposed to lower embryonic temperatures. This may have occurred as a result of the entrainment of eclosion behavior by circadian rhythms (Kyriacou et al., 1990; Paranjpe et al., 2005), in which case delayed pupae could catch up to the eclosion schedule of other pupae, as long as pupation was delayed by less than 24 h. Alternatively, this pattern may be an artifact of the low sample sizes and high variance in development times that accompanied the more extreme thermal exposures, as far fewer individuals successfully hatched after exposure to the highest temperatures (Fig. 3A). But despite this incongruity between pupation and eclosion times at the highest temperatures of embryonic heat stress, overall our data indicate that overexpression of *Hsp23* in the maternal germline not only increased embryonic hatching success after exposure to heat stress but also had enduring effects on offspring performance throughout larval development.

## DISCUSSION

Despite over five decades of research on the heat shock response, there have been relatively few studies to connect genotype to phenotype in the context of heat shock protein expression and organismal performance (Somero et al., 2017). Here, we demonstrate the direct effects of maternal loading of *Hsp23* mRNA for offspring survival and performance following acute heat stress in a common genetic background. We found that increases in the levels of *Hsp23* in early *D. melanogaster* embryos confer significant protection from heat stress during a thermally sensitive life stage.

### *Hsp23* maternal loading and the embryonic heat shock response

*Hsp23* overexpression in female ovaries resulted in embryos with increased abundance of *Hsp23* mRNA. Thus, the phenotypic effects of maternal genotype on whole-embryo thermal tolerance that we observed were likely to be the consequence of increased maternal loading that elevated basal levels of *Hsp23* in early embryos. We also observed that embryos induced the expression of *Hsp23* in response to heat shock regardless of maternal genotype, with no significant interaction between maternal genotype and temperature. Previous work has shown that the transgenic manipulation of heat

shock protein 70 (*Hsp70*) gene induction in *D. melanogaster* (Welte et al., 1993) causes massive increases in the heat-induced transcription of *Hsp70* by more than 500-fold (Hoekstra and Montooth, 2013). This increase in heat-inducible *Hsp70* mRNA translated into approximately 2.5-fold higher levels of Hsp70 protein over the time course of 2 h in response to heat stress in wandering third-instar larvae, which allowed larvae to survive significantly longer at 39°C (Feder et al., 1996). In comparison, the higher levels of *Hsp23* induced by Gal4/UAS overexpression in female ovaries that we report herein were subtle. These overexpression levels were similar to previous reports of overexpression of other genes in fly ovaries that were driven by similar transgenic constructs (Dominguez et al., 2016). But regardless of the absolute degree of overexpression, the higher maternal loading of *Hsp23* increased embryonic LT<sub>50</sub> by approximately 1°C, and this increase in LT<sub>50</sub> signified a substantial increase in thermal tolerance. In particular, following 45 min of heat stress at 34°C, 87.5% of the embryos with higher *Hsp23* levels successfully hatched, whereas only 46.7% of embryos with normal levels of *Hsp23* survived this heat treatment.

Beyond the aforementioned work in *D. melanogaster* (Welte et al., 1993; Feder et al., 1996) and the present study, there have been few studies to directly test the effect of heat shock protein expression on whole-organism thermal tolerance, with one study showing that targeted gene knockdown of *Hsp22* and *Hsp23* in adult *D. melanogaster* decreases cold tolerance (Colinet et al., 2010). A much larger body of work has used interspecies and interpopulation comparisons to infer the evolutionary history of the heat shock response (Hofmann and Somero, 1996; Tomanek and Somero, 2000; Dong et al., 2008; Lockwood et al., 2010; Schoville et al., 2012; Dowd and Somero, 2013; Nguyen et al., 2016). Based on these studies, it is well established that HSP expression is an adaptive physiological mechanism for coping with acute thermal stress. Accordingly, population-level comparisons have discovered clinal variation in *Hsp23* alleles across environmental thermal gradients in *Drosophila buzzatii* in Australia (Frydenberg et al., 2010), as well as clines in allele frequencies of *Hsp23* and *Hsp26* among *D. melanogaster* populations in Australia (Frydenberg et al., 2003). In addition, laboratory thermal selection studies have found evolved changes in HSP expression to accompany adaptive shifts in upper thermal limits (Rudolph et al., 2010; Kelly et al., 2017). It is important to note, however, that increased levels of HSP expression do not always accompany thermal adaptation to higher temperatures (Zatsepina et al., 2001). In fact, experimental evolution to a higher constant temperature in *D. melanogaster* led to the evolution of lower *Hsp70* expression and concomitant decreases in acute thermal tolerance (Bettencourt et al., 1999). Thus, higher basal and inducible HSP expression may be adaptive primarily in environments that are characterized by sudden and dramatic heat stress events, rather than constant hot environments (Dong et al., 2008; Dilly et al., 2012).

Even though our observed genotypic effects on embryo thermal tolerance were most likely the result of differential maternal loading of *Hsp23*, it is interesting to note that we observed zygotic induction of this gene in offspring of both maternal genotypes. At this early stage of development (0–1 h old), zygotic genomes are predicted to be transcriptionally inactive because embryos have not undergone the maternal-to-zygotic transition (MZT) that occurs in the mid-blastula stage (approximately 2.5 h old) in *D. melanogaster* (Tadros and Lipshitz, 2009; Blythe and Wieschaus, 2015a). However, prior to the canonical MZT, zygotic gene expression appears to be responsive to thermal variability. A previous analysis of protein

expression in early *D. melanogaster* embryos using 2-dimensional gel electrophoresis found that heat shock proteins were heat inducible at 1–2 h post-fertilization (Graziosi et al., 1980). Moreover, recent work in *D. melanogaster* has highlighted the developmental role of early zygotic gene transcription that precedes the MZT (Ali-Murthy et al., 2013), but the full extent to which the early zygotic genome responds to thermal variability warrants new investigation. In the present study, *Hsp23* expression was induced in early embryos to a much lesser extent (approximately 4-fold) than what has been previously observed in later stages of development. In fact, Leemans et al. (2000) found *Hsp23* to be heat induced by more than 10-fold in late-stage embryos (18 h old) and Brown et al. (2014) reported this gene to be heat induced by approximately 100-fold in adults (Table 1). Therefore, while embryos at the earliest stages of development appear to exhibit a heat shock response, it is at a much-reduced level compared with later stages. This explains why early embryonic stages are more thermally sensitive than later stages (Walter et al., 1990; Welte et al., 1993) and further emphasizes the potentially critical role of maternally loaded mRNAs and proteins as thermal protectants. It is important to note that while we have demonstrated the potentially critical role of maternal loading of *Hsp23* mRNA for offspring survival in the context of thermal stress, the extent to which mothers adjust the loading of *Hsp23* or other sHSP mRNAs in a natural setting remains to be determined. Further, we would like to point out that while our observed phenotypic effects were most likely due to differential maternal loading of *Hsp23*, we cannot rule out the possibility that concomitant expression changes of other genes occurred as a result of our transgenic manipulations (Bettencourt et al., 2008).

The specific mechanism by which the Hsp23 protein confers thermal tolerance remains elusive. This protein exhibits general chaperoning activity by preventing heat denaturation of proteins *in vitro* (Heikkila et al., 2006), but it has also been shown to be involved in ventral furrow morphogenesis in early fly embryos under benign thermal conditions (Gong et al., 2004). This developmental role may be mediated through the interaction of Hsp23 with elements of the cytoskeleton, such as microtubules (Hughes et al., 2008) and actin microfilaments (Goldstein and Gunawardena, 2000). The cytoskeletal association of Hsp23 is further supported by the observation that this protein was the only small heat shock protein whose overexpression was observed to prevent actin-dependent contractile dysfunction in cardiomyocytes of *D. melanogaster* larvae (Zhang et al., 2011). Indeed, among the sHSPs that are highly induced in response to heat stress (Table 1), Hsp23 is the only one that both is localized to the cytoplasm (Morrow and Tanguay, 2015) and contains an actin-binding domain (sequence data not shown). Whether or not the interaction of Hsp23 with the cytoskeleton provides protection in the context of thermal stress has not been reported, but this is a worthwhile topic of future study.

#### Effects of embryonic heat stress on post-embryonic larval development

We found that the *Hsp23*-mediated maternal effect extended beyond embryonic thermal tolerance (i.e. hatching success) and attenuated heat-induced defects in larval performance (i.e. pupation height). It is surprising that a brief thermal exposure experienced during the first 2 h of life has negative consequences that last for days to weeks, throughout larval development. Drops in pupation height and increases in development time have been previously associated with lower energetic performance and fitness (Mueller and Sweet, 1986; Montooth et al., 2010; Hoekstra et al., 2013; Meiklejohn et al.,

2013), and may have important ecological consequences in natural populations.

The persistent effects of maternal transcript loading on larval development post-heat stress might have important consequences for the evolution of maternal effects. A recent study reported significant maternal effects that determined both acute (i.e. 1 h at 27°C) and chronic (i.e. constant exposure to 24°C) thermal tolerance in offspring embryos among wild populations of *Ciona intestinalis* (Sato et al., 2015). This suggests that there is natural genetic variation for maternal effects of thermal traits in some species. However, evolutionary theory predicts that selection is less effective on alleles that confer maternal effects, compared with genes expressed in both sexes, because of a reduced effective population size (Demuth and Wade, 2007; Van Dyken and Wade, 2010). Consequently, maternal-effect genes can harbor higher levels of standing genetic variation, presumably because deleterious mutations are not removed as frequently from the population and these genes cannot evolve as readily via positive selection (Barker et al., 2005). Nevertheless, if maternal effects not only determine hatching success but also influence larval performance and development, then the fitness consequences associated with thermal stress may lead to a greater strength of selection on maternal-effect genes (i.e. greater difference in fitness among maternal-effect genotypes) than would otherwise be predicted from the maternal effects of offspring hatching success alone. Because responses to natural selection depend on both the strength and the efficacy of selection, the broad developmental effects of maternal transcript loading may favor the adaptive evolution of maternal-effect thermal traits, depending on the thermal environment (Chevin et al., 2010; Chevin and Hoffmann, 2017) and the underlying genetic architecture (Wolf and Wade, 2016). But, to our knowledge, there have been no examples of this phenomenon reported in the literature.

## Conclusions

Overall, our data suggest that maternal effects can have profound impacts on offspring survival and performance in the context of environmental change. The observation that differential maternal loading of mRNAs of a single gene can have lasting consequences throughout larval development, by modifying pupation height and development time, demonstrates that protective maternal effects extend well beyond the maternal-to-zygotic transcriptional transition. The role of maternal effects and the environmental stress physiology of early life stages has largely been ignored in the field of ecological physiology (but see Sato et al., 2015). Future work is warranted in this realm, because these factors are likely to be critical determinants of species responses to environmental variability (Angilletta et al., 2013; Anderson and Podrabsky, 2014; Buckley et al., 2015; Wagner and Podrabsky, 2015; Svetec et al., 2016), particularly if early life stages are most sensitive to environmental stress (Walter et al., 1990; Welte et al., 1993).

## Acknowledgements

We thank Rosemary Scavotto and Sarah Howe for assistance with fly husbandry and Tarun Gupta for valuable discussions that aided in the preparation of the manuscript.

## Competing interests

The authors declare no competing or financial interests.

## Author contributions

Conceptualization: B.L.L., K.L.M.; Methodology: B.L.L., K.L.M.; Validation: B.L.L., C.R.J.; Formal analysis: B.L.L., K.L.M.; Investigation: B.L.L., C.R.J.; Resources: B.L.L., K.L.M.; Data curation: B.L.L.; Writing - original draft: B.L.L.; Writing - review &

editing: B.L.L., C.R.J., K.L.M.; Visualization: B.L.L., K.L.M.; Supervision: B.L.L., K.L.M.; Project administration: B.L.L., C.R.J., K.L.M.; Funding acquisition: B.L.L., K.L.M.

## Funding

This work was supported by a National Institutes of Health National Research Service Award (NRSA) postdoctoral fellowship (1F32GM100669-01) and funding from the University of Vermont to B.L.L. and National Science Foundation CAREER award (IOS-1505247) to K.L.M. Deposited in PMC for release after 12 months.

## Data availability

modENCODE transcript data are publicly available online at flybase.org (Gramates et al., 2017). Phenotypic data reported herein are available from the Dryad digital repository (Lockwood et al., 2017): <https://doi.org/10.5061/dryad.55cc1>.

## References

- Ali-Murthy, Z., Lott, S. E., Eisen, M. B. and Kornberg, T. B. (2013). An essential role for zygotic expression in the pre-cellular *Drosophila* embryo. *PLoS Genet.* **9**, e1003428.
- Anderson, S. N. and Podrabsky, J. E. (2014). The effects of hypoxia and temperature on metabolic aspects of embryonic development in the annual killifish *Austrofundulus limnaeus*. *J. Comp. Physiol. B* **184**, 355–370.
- Angilletta, M. J., Zelic, M. H., Adrian, G. J., Hurliman, A. M. and Smith, C. D. (2013). Heat tolerance during embryonic development has not diverged among populations of a widespread species (*Sceloporus undulatus*). *Conserv. Physiol.* **1**, cot018.
- Arrigo, A.-P. (1987). Cellular localization of HSP23 during *Drosophila* development and following subsequent heat shock. *Dev. Biol.* **122**, 39–48.
- Attrill, H., Falls, K., Goodman, J. L., Millburn, G. H., Antonazzo, G., Rey, A. J. and Marygold, S. J. (2016). Flybase: Establishing a gene group resource for *Drosophila melanogaster*. *Nucleic Acids Res.* **44**, D786–D792.
- Ayme, A. and Tissières, A. (1985). Locus 67B of *Drosophila melanogaster* contains seven, not four, closely related heat shock genes. *EMBO J.* **4**, 2949–2954.
- Barker, M. S., Demuth, J. P. and Wade, M. J. (2005). Maternal expression relaxes constraint on innovation of the anterior determinant, bicoid. *PLoS Genet.* **1**, 527–530.
- Berger, E. M. and Woodward, M. P. (1983). Small heat shock proteins may confer thermal tolerance in *Drosophila*. *Exp. Cell Res.* **147**, 437–442.
- Bettencourt, B. R., Feder, M. E. and Cavicchi, S. (1999). Experimental evolution of HSP70 expression and thermotolerance in *Drosophila melanogaster*. *Evolution* **53**, 484–492.
- Bettencourt, B. R., Hogan, C. C., Nimali, M. and Drohan, B. W. (2008). Inducible and constitutive heat shock gene expression responds to modification of Hsp70 copy number in *Drosophila melanogaster* but does not compensate for loss of thermotolerance in Hsp70 null flies. *BMC Biol.* **6**, 5.
- Bischof, J., Bjorklund, M., Furger, E., Schertel, C., Taipale, J. and Basler, K. (2013). A versatile platform for creating a comprehensive UAS-ORFeome library in *Drosophila*. *Development* **140**, 2434–2442.
- Blythe, S. A. and Wieschaus, E. F. (2015a). Coordinating cell cycle remodeling with transcriptional activation at the *Drosophila* MBT. *Curr. Top. Dev. Biol.* **113**, 113–148.
- Blythe, S. A. and Wieschaus, E. F. (2015b). Zygotic genome activation triggers the DNA replication checkpoint at the midblastula transition. *Cell* **160**, 1169–1181.
- Brand, A. H. and Perrimon, N. (1993). Targeted gene expression as a means of altering cell fates and generating dominant phenotypes. *Development* **118**, 401–415.
- Brown, J. B., Boley, N., Eisman, R., May, G. E., Stoiber, M. H., Duff, M. O., Booth, B. W., Wen, J., Park, S., Suzuki, A. M. et al. (2014). Diversity and dynamics of the *Drosophila* transcriptome. *Nature* **512**, 1–7.
- Buckley, L. B. and Huey, R. B. (2016). How extreme temperatures impact organisms and the evolution of their thermal tolerance. *Integr. Comp. Biol.* **56**, 98–109.
- Buckley, B. A., Gracey, A. Y. and Somero, G. N. (2006). The cellular response to heat stress in the goby *Gillichthys mirabilis*: a cDNA microarray and protein-level analysis. *J. Exp. Biol.* **209**, 2660.
- Buckley, L. B., Ehrenberger, J. C. and Angilletta, M. J., Jr. (2015). Thermoregulatory behaviour limits local adaptation of thermal niches and confers sensitivity to climate change. *Funct. Ecol.* **29**, 1038–1047.
- Chevin, L.-M. and Hoffmann, A. A. (2017). Evolution of phenotypic plasticity in extreme environments. *Philos. Trans. R. Soc. B Biol. Sci.* **372**, pii: 20160138.
- Chevin, L.-M., Lande, R. and Mace, G. M. (2010). Adaptation, plasticity, and extinction in a changing environment: towards a predictive theory. *PLoS Biol.* **8**, e1000357.
- Colinet, H., Lee, S. F. and Hoffmann, A. (2010). Knocking down expression of Hsp22 and Hsp23 by RNA interference affects recovery from chill coma in *Drosophila melanogaster*. *J. Exp. Biol.* **213**, 4146–4150.



- Cooper, B. S., Burrus, C. R., Ji, C., Hahn, M. W. and Montooth, K. L. (2015). Similar efficacies of selection shape mitochondrial and nuclear genes in both *Drosophila melanogaster* and *Homo sapiens*. *G3* **5**, 2165–2176.
- Demuth, J. P. and Wade, M. J. (2007). Maternal expression increases the rate of bicoid evolution by relaxing selective constraint. *Genetica* **129**, 37–43.
- Denny, M. W., Dowd, W. W., Bilir, L. and Mach, K. J. (2011). Spreading the risk: small-scale body temperature variation among intertidal organisms and its implications for species persistence. *J. Exp. Mar. Biol. Ecol.* **400**, 175–190.
- Dilly, G. F., Young, C. R., Lane, W. S., Pangilinan, J. and Girguis, P. R. (2012). Exploring the limit of metazoan thermal tolerance via comparative proteomics: thermally induced changes in protein abundance by two hydrothermal vent polychaetes. *Proc. Biol. Sci.* **279**, 3347–3356.
- Dominguez, C., Zuniga, A., Hanna, P., Hodar, C., Gonzalez, M. and Cambiasso, V. (2016). Target genes of Dpp/BMP signaling pathway revealed by transcriptome profiling in the early *D. melanogaster* embryo. *Gene* **591**, 191–200.
- Dong, Y., Miller, L. P., Sanders, J. G. and Somero, G. N. (2008). Heat-shock protein 70 (Hsp70) expression in four limpets of the genus *Lottia*: interspecific variation in constitutive and inducible synthesis correlates with in situ exposure to heat stress. *Biol. Bull.* **215**, 173–181.
- Dowd, W. W. and Somero, G. N. (2013). Behavior and survival of *Mytilus* congeners following episodes of elevated body temperature in air and seawater. *J. Exp. Biol.* **216**, 502–514.
- Dowd, W. W., King, F. A. and Denny, M. W. (2015). Thermal variation, thermal extremes and the physiological performance of individuals. *J. Exp. Biol.* **218**, 1956–1967.
- Duffy, J. B. (2002). GAL4 system in *Drosophila*: a fly geneticist's Swiss army knife. *Genesis* **34**, 1–15.
- Evans, T. G. (2015). Considerations for the use of transcriptomics in identifying the “genes that matter” for environmental adaptation. *J. Exp. Biol.* **218**, 1925–1935.
- Feder, M. E., Cartano, N. V., Milos, L., Krebs, R. A. and Lindquist, S. L. (1996). Effect of engineering Hsp70 copy number on Hsp70 expression and tolerance of ecologically relevant heat shock in larvae and pupae of *Drosophila melanogaster*. *J. Exp. Biol.* **199**, 1837–1844.
- Feder, M. E., Blair, N. and Figueras, H. (1997). Natural thermal stress and heat-shock protein expression in *Drosophila* larvae and pupae. *Funct. Ecol.* **11**, 90–100.
- Frydenberg, J., Hoffmann, A. A. and Loeschcke, V. (2003). DNA sequence variation and latitudinal associations in hsp23, hsp26 and hsp27 from natural populations of *Drosophila melanogaster*. *Mol. Ecol.* **12**, 2025–2032.
- Frydenberg, J., Barker, J. S. F. and Loeschcke, V. (2010). Characterization of the shsp genes in *Drosophila buzzatii* and association between the frequency of Valine mutations in hsp23 and climatic variables along a longitudinal gradient in Australia. *Cell Stress Chaperones* **15**, 271–280.
- Gasch, A. P., Spellman, P. T., Kao, C. M., Carmel-Harel, O., Eisen, M. B., Storz, G., Botstein, D. and Brown, P. O. (2000). Genomic expression programs in the response of yeast cells to environmental changes. *Mol. Biol. Cell* **11**, 4241–4257.
- Gibney, P. A., Lu, C., Caudy, A. A., Hess, D. C. and Botstein, D. (2013). Yeast metabolic and signaling genes are required for heat-shock survival and have little overlap with the heat-induced genes. *Proc. Natl. Acad. Sci. USA* **110**, E4393–E4402.
- Goldstein, L. S. B. and Gunawardena, S. (2000). Flying through the *Drosophila* cytoskeletal genome. *J. Cell Biol.* **150**, 63–68.
- Gong, L., Puri, M., Unlü, M., Young, M., Robertson, K., Viswanathan, S., Krishnaswamy, A., Dowd, S. R. and Minden, J. S. (2004). *Drosophila* ventral furrow morphogenesis: a proteomic analysis. *Development* **131**, 643–656.
- Gramates, L. S., Marygold, S. J., Dos Santos, G., Urbano, J.-M., Antonazzo, G., Matthews, B. B., Rey, A. J., Tabone, C. J., Crosby, M. A., Emmert, D. B. et al. (2017). FlyBase at 25: looking to the future. *Nucleic Acids Res.* **45**, D663–D671.
- Graziosi, G., Micali, F., Marzari, R., de Cristini, F. and Savoini, A. (1980). Variability of response of early *Drosophila* embryos to heat shock. *J. Exp. Zool.* **214**, 141–145.
- Heikkila, J. J., Tanguay, R. M., Morrow, G., Heikkila, J. J. and Tanguay, R. M. (2006). Differences in the chaperone-like activities of the four main small heat shock proteins of *Drosophila melanogaster*. *Cell Stress Chaperones* **11**, 51–60.
- Hoekstra, L. A. and Montooth, K. L. (2013). Inducing extra copies of the Hsp70 gene in *Drosophila melanogaster* increases energetic demand. *BMC Evol. Biol.* **13**, 68.
- Hoekstra, L. A., Siddiq, M. A. and Montooth, K. L. (2013). Pleiotropic effects of a mitochondrial-nuclear incompatibility depend upon the accelerating effect of temperature in *Drosophila*. *Genetics* **195**, 1129–1139.
- Hofmann, G. E. and Somero, G. N. (1996). Interspecific variation in thermal denaturation of proteins in the congeneric mussels *Mytilus trossulus* and *M. galloprovincialis*: evidence from the heat-shock response and protein ubiquitination. *Mar. Biol.* **126**, 65–75.
- Horváth, I., Multhoff, G., Sonnleitner, A. and Vigh, L. (2008). Membrane-associated stress proteins: more than simply chaperones. *Biochim. Biophys. Acta Biomembr.* **1778**, 1653–1664.
- Horwitz, J. (1992). Alpha-crystallin can function as a molecular chaperone. *Proc. Natl. Acad. Sci. USA* **89**, 10449–10453.
- Horwitz, J., Emmons, T. and Takemoto, L. (1992). The ability of lens alpha crystallin to protect against heat-induced aggregation is age-dependent. *Curr. Eye Res.* **11**, 817–822.
- Huey, R. B., Patridge, L. and Fowler, K. (1991). Thermal sensitivity of *Drosophila melanogaster* responds rapidly to laboratory natural selection. *Evolution* **45**, 751–756.
- Hughes, J. R., Meireles, A. M., Fisher, K. H., Garcia, A., Antrobus, P. R., Wainman, A., Zitzmann, N., Deane, C., Ohkura, H. and Wakefield, J. G. (2008). A microtubule interactome: complexes with roles in cell cycle and mitosis. *PLoS Biol.* **6**, 785–795.
- Kelly, M. W., Pankey, M. S., DeBiase, M. B. and Plachetzki, D. C. (2017). Adaptation to heat stress reduces phenotypic and transcriptional plasticity in a marine copepod. *Funct. Ecol.* **31**, 398–406.
- Kültz, D. (2005). Molecular and evolutionary basis of the cellular stress response. *Annu. Rev. Physiol.* **67**, 225–257.
- Kyriacou, C. P., Oldroyd, M., Wood, J., Sharp, M. and Hill, M. (1990). Clock mutations alter developmental timing in *Drosophila*. *Heredity* **64**, 395–401.
- Leemans, R., Egger, B., Loop, T., Kammermeier, L., He, H., Hartmann, B., Certa, U., Hirth, F. and Reichert, H. (2000). Quantitative transcript imaging in normal and heat-shocked *Drosophila* embryos by using high-density oligonucleotide arrays. *Proc. Natl. Acad. Sci. USA* **97**, 12138–12143.
- Leicht, B. G., Biessmann, H., Palter, K. B. and Bonner, J. J. (1986). Small heat shock proteins of *Drosophila* associate with the cytoskeleton. *Proc. Natl. Acad. Sci. USA* **83**, 90.
- Lindquist, S. (1981). Regulation of protein synthesis during heat shock. *Nature* **293**, 311–314.
- Lockwood, B. L., Sanders, J. G. and Somero, G. N. (2010). Transcriptomic responses to heat stress in invasive and native blue mussels (genus *Mytilus*): molecular correlates of invasive success. *J. Exp. Biol.* **213**, 3548–3558.
- Lockwood, B. L., Julick, C. R., Montooth, K. L. (2017). Data from: Maternal loading of a small heat shock protein increases embryo thermal tolerance in *Drosophila melanogaster*. *Dryad Digital Repository*. <https://doi.org/10.5061/dryad.55cc1>
- Meiklejohn, C. D., Holmbeck, M. A., Siddiq, M. A., Abt, D. N., Rand, D. M. and Montooth, K. L. (2013). An incompatibility between a mitochondrial tRNA and its nuclear-encoded tRNA synthetase compromises development and fitness in *Drosophila*. *PLoS Genet.* **9**, e1003238.
- Michaud, S. and Tanguay, R. M. (2003). Expression of the Hsp23 chaperone during *Drosophila* embryogenesis: association to distinct neural and glial lineages. *BMC Dev. Biol.* **3**, 9.
- Mirault, M.-E., Goldschmidt-Clermont, M., Moran, L., Arrigo, A. P. and Tissières, A. (1978). The effect of heat shock on gene expression in *Drosophila melanogaster*. *Cold Spring Harb. Symp. Quant. Biol.* **42**, 819–827.
- Montooth, K. L., Meiklejohn, C. D., Abt, D. N. and Rand, D. M. (2010). Mitochondrial-nuclear epistasis affects fitness within species but does not contribute to fixed incompatibilities between species of *Drosophila*. *Evolution* **64**, 3364–3379.
- Morrow, G. and Tanguay, R. M. (2015). *Drosophila* small heat shock proteins: an update on their features and functions. In *The Big Book on Small Heat Shock Proteins* (ed. R. M. Tanguay and L. E. Hightower), pp. 579–606. Cham, Switzerland: Springer International.
- Motulsky, H. J. and Brown, R. E. (2006). Detecting outliers when fitting data with nonlinear regression - a new method based on robust nonlinear regression and the false discovery rate. *BMC Bioinformatics* **7**, 123.
- Mueller, L. D. and Sweet, V. F. (1986). Density-dependent natural selection in *Drosophila*: evolution of pupation height. *Evolution* **40**, 1354–1356.
- Nguyen, A. D., Gotelli, N. J. and Cahan, S. H. (2016). The evolution of heat shock protein sequences, cis-regulatory elements, and expression profiles in the eusocial Hymenoptera. *BMC Evol. Biol.* **16**, 1–13.
- Paranjpe, D. A., Anitha, D., Chandrashekar, M. K., Joshi, A. and Sharma, V. K. (2005). Possible role of eclosion rhythm in mediating the effects of light-dark environments on pre-adult development in *Drosophila melanogaster*. *BMC Dev. Biol.* **5**, 5.
- Pauli, D., Arrigo, A.-P., Vazquez, J., Tonka, C.-H. and Tissières, A. (1989). Expression of the small heat shock genes during *Drosophila* development: comparison of the accumulation of hsp23 and hsp27 mRNAs and polypeptides. *Genome* **31**, 671–676.
- Pfaffl, M. W. (2001). A new mathematical model for relative quantification in real-time RT-PCR. *Nucleic Acids Res.* **29**, e45.
- Richter, K., Haslbeck, M. and Buchner, J. (2010). The heat shock response: life on the verge of death. *Mol. Cell* **40**, 253–266.
- Rudolph, B., Gebendorfer, K. M., Buchner, J. and Winter, J. (2010). Evolution of *Escherichia coli* for growth at high temperatures. *J. Biol. Chem.* **285**, 19029–19034.
- Sato, A., Kawashima, T., Fujie, M., Hughes, S., Satoh, N. and Shimeld, S. M. (2015). Molecular basis of canalization in an ascidian species complex adapted to different thermal conditions. *Sci. Rep.* **5**, 16717.
- Schoville, S. D., Barreto, F. S., Moy, G. W., Wolff, A. and Burton, R. S. (2012). Investigating the molecular basis of local adaptation to thermal stress: population differences in gene expression across the transcriptome of the copepod *Tigriopus californicus*. *BMC Evol. Biol.* **12**, 170.

- Schüpbach, T. and Wieschaus, E. (1986). Maternal-effect mutations altering the anterior-posterior pattern of the *Drosophila* embryo. *Dev. Genes Evol.* **195**, 302–317.
- Somero, G. N., Lockwood, B. L. and Tomanek, L. (2017). *Biochemical Adaptation: Response to Environmental Challenges from Life's Origins to the Anthropocene*. Sunderland, MA: Sinauer Associates.
- Sveteć, N., Cridland, J. M., Zhao, L. and Begun, D. J. (2016). The adaptive significance of natural genetic variation in the DNA damage response of *Drosophila melanogaster*. *PLoS Genet.* **12**, e1005869.
- Tadros, W. and Lipshitz, H. D. (2009). The maternal-to-zygotic transition: a play in two acts. *Development* **136**, 3033–3042.
- Terblanche, J. S., Hoffmann, A. A., Mitchell, K. A., Rako, L., le Roux, P. C. and Chown, S. L. (2011). Ecologically relevant measures of tolerance to potentially lethal temperatures. *J. Exp. Biol.* **214**, 3713–3725.
- Tissières, A., Mitchell, H. K. and Tracy, U. M. (1974). Protein synthesis in salivary glands of *Drosophila melanogaster*: Relation to chromosome puffs. *J. Mol. Biol.* **84**, 389–398.
- Tomanek, L. and Somero, G. N. (1999). Evolutionary and acclimation-induced variation in the heat-shock responses of congeneric marine snails (genus *Tegula*) from different thermal habitats: implications for limits of thermotolerance and biogeography. *J. Exp. Biol.* **202**, 2925–2936.
- Tomanek, L. and Somero, G. N. (2000). Time course and magnitude of synthesis of heat-shock proteins in congeneric marine snails (Genus *Tegula*) from different tidal heights. *Physiol. Biochem. Zool.* **73**, 249–256.
- Tomanek, L. and Zuzow, M. J. (2010). The proteomic response of the mussel congeners *Mytilus galloprovincialis* and *M. trossulus* to acute heat stress: implications for thermal tolerance limits and metabolic costs of thermal stress. *J. Exp. Biol.* **213**, 3559–3574.
- Tsvetkova, N. M., Horváth, I., Török, Z., Wolkers, W. F., Balogi, Z., Shigapova, N., Crowe, L. M., Tablin, F., Vierling, E., Crowe, J. H. et al. (2002). Small heat-shock proteins regulate membrane lipid polymorphism. *Proc. Natl. Acad. Sci. USA* **99**, 13504–13509.
- Van Dyken, J. D. and Wade, M. J. (2010). The genetic signature of conditional expression. *Genetics* **184**, 557–570.
- Wagner, J. T. and Podrabsky, J. E. (2015). Extreme tolerance and developmental buffering of UV-C induced DNA damage in embryos of the annual killifish *Austrofundulus limnaeus*. *J. Exp. Zool. A Ecol. Genet. Physiol.* **323**, 10–30.
- Walter, M. F., Biessmann, H. and Petersen, N. S. (1990). Heat shock causes the collapse of the intermediate filament cytoskeleton in *Drosophila* embryos. *Dev. Genet.* **11**, 270–279.
- Welte, M. A., Tetrault, J. M., Dellavalle, R. P. and Lindquist, S. L. (1993). A new method for manipulating transgenes: engineering heat tolerance in a complex, multicellular organism. *Curr. Biol.* **3**, 842–853.
- Wieschaus, E. (1996). Embryonic transcription and the control of developmental pathways. *Genetics* **142**, 5–10.
- Wolf, J. B. and Wade, M. J. (2016). The evolutionary genetics of maternal effects. *Evolution* **70**, 827–839.
- Zatsepina, O. G., Velikodvorskaia, V. V., Molodtsov, V. B., Garbuz, D., Lerman, D. N., Bettencourt, B. R., Feder, M. E. and Evgenev, M. B. (2001). A *Drosophila melanogaster* strain from sub-equatorial Africa has exceptional thermotolerance but decreased Hsp70 expression. *J. Exp. Biol.* **204**, 1869–1881.
- Zhang, D., Ke, L., Mackovicova, K., Der Want, J. J. L. V., Sibon, O. C. M., Tanguay, R. M., Morrow, G., Henning, R. H., Kampinga, H. H. and Brundel, B. J. J. M. (2011). Effects of different small HSPB members on contractile dysfunction and structural changes in a *Drosophila melanogaster* model for Atrial Fibrillation. *J. Mol. Cell. Cardiol.* **51**, 381–389.
